# Supplementary material for: The poplar pangenome provides insights into the evolutionary history of the genus
Source: PubMed Central journal article supplement (PMC6581948; doi:10.1038/s42003-019-0474-7), 2019-06-18
Supplement: 42003_2019_474_MOESM1_ESM.pdf [file 42003_2019_474_MOESM1_ESM.pdf]

## Supplementary Figures

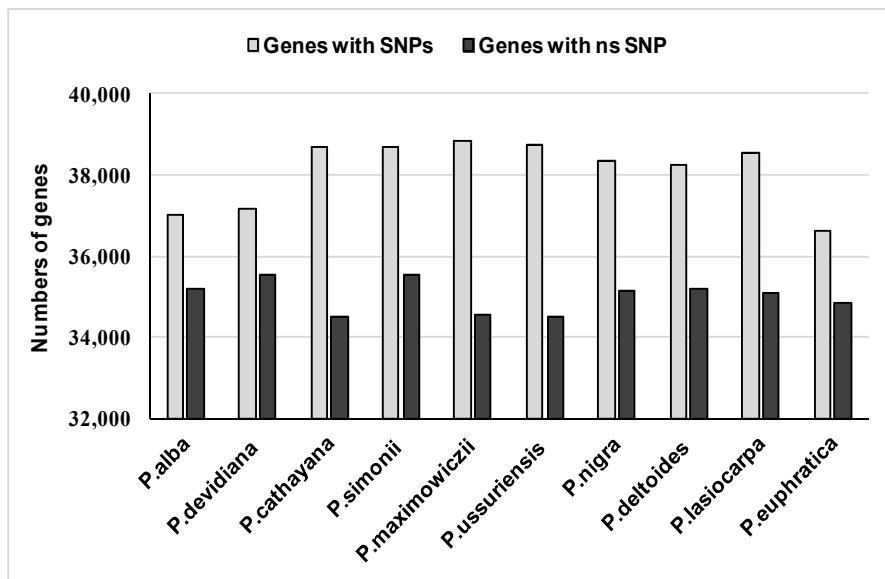

Supplementary Figure 1 Comparison of the numbers (shown by bar lengths) of genes containing SNPs and non-synonymous SNPs (nsSNPs) in the 10 poplar species.

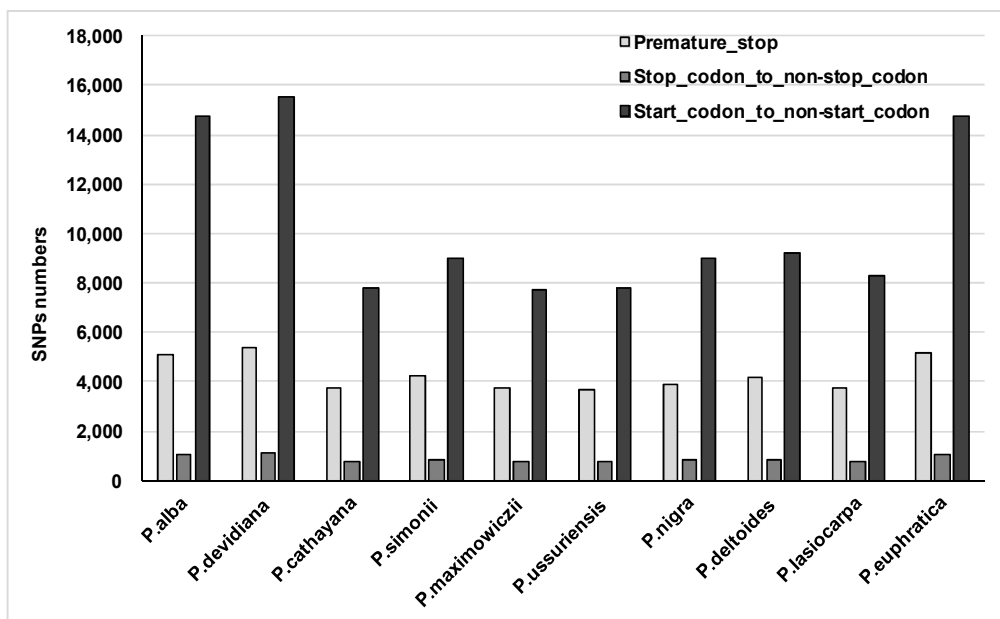

Supplementary Figure 2 Number of various types of large-effect SNPs in the 10 poplar species.

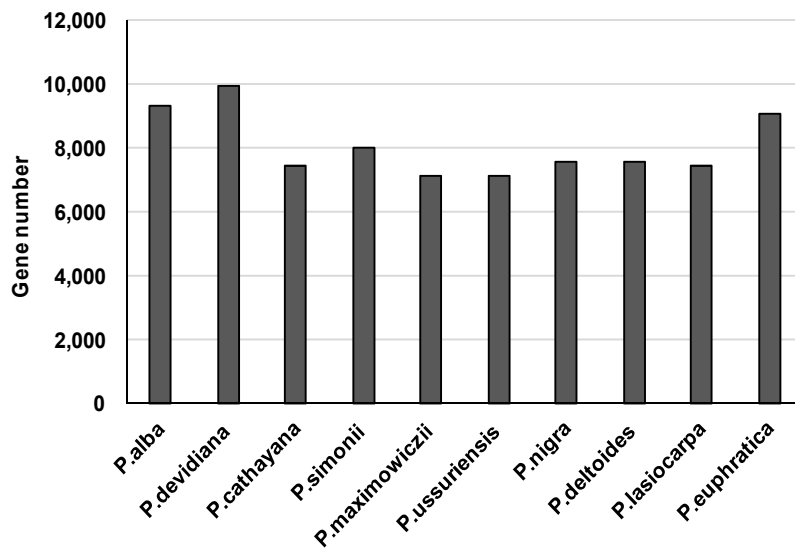

Supplementary Figure 3 Number of genes impacted by frameshift indels in the 10 poplar species.

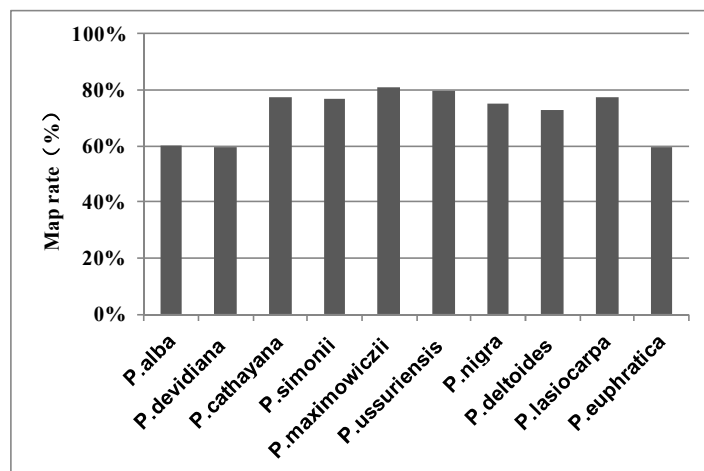

Supplementary Figure 4 Mapping rate of the 10 poplar species.

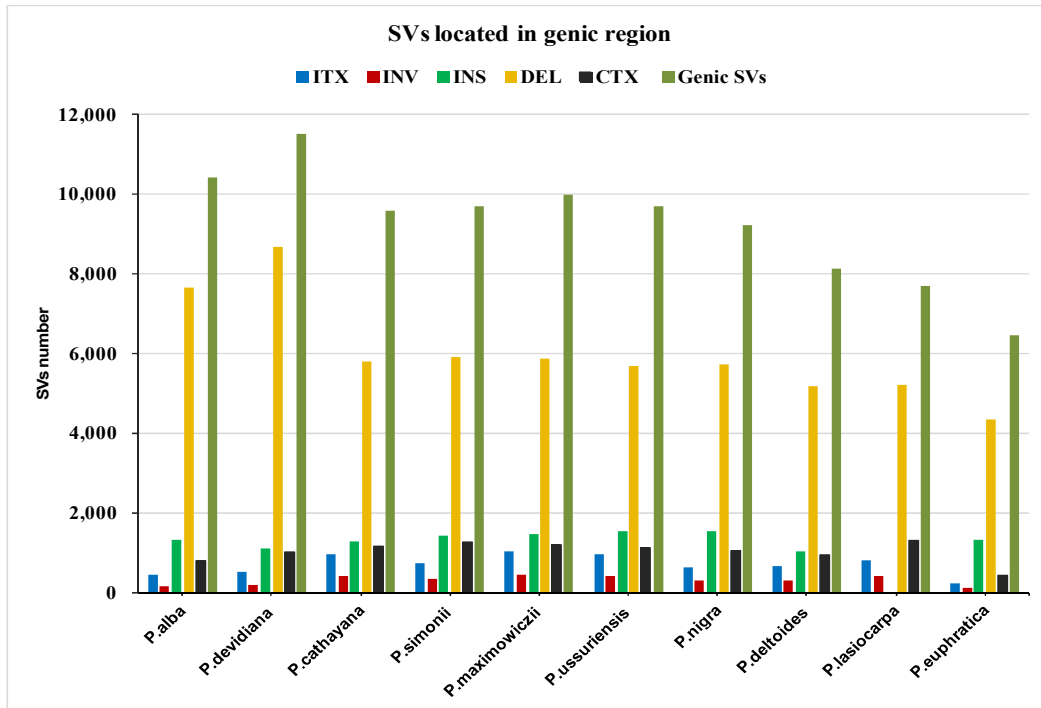

Supplementary Figure 5 SVs in the genic regions of the 10 poplar species. Most of the genic SVs were deletions (65.02%), although 13.07% were insertions, 11.06% were CTXs, 7.57% were ITXs, and 3.29% were INV, indicating that poplar genes are more tolerant of large deletions than other types of SVs.

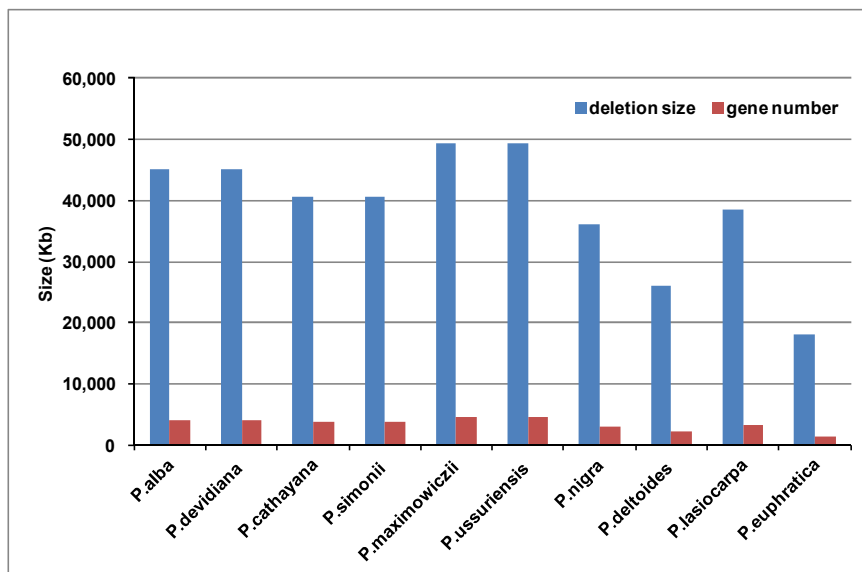

Supplementary Figure 6 Size of the largest deletions in the 10 poplar species and the number of genes located in these largest deletions in the corresponding regions of the reference genome.

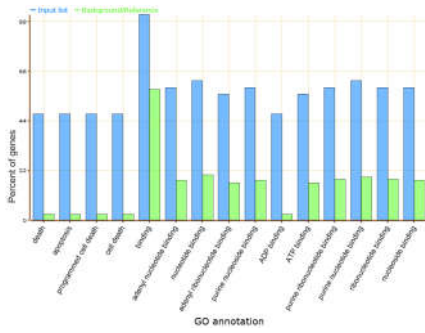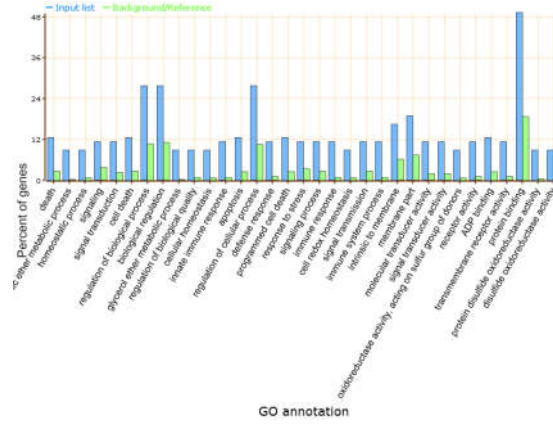

*P. alba* (Chr01, 1175321bp)

*P. davidiana* (Chr19, 1441218 bp)

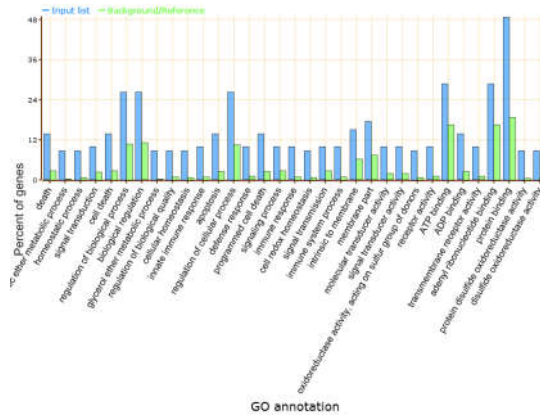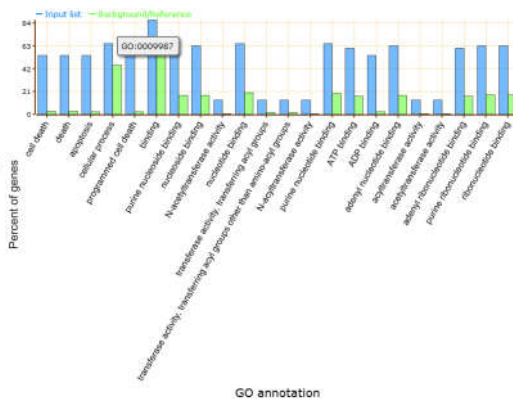

*P. cathayana* (Chr19, 1450930 bp)

*P. simonii* (Chr01, 1706425 bp)

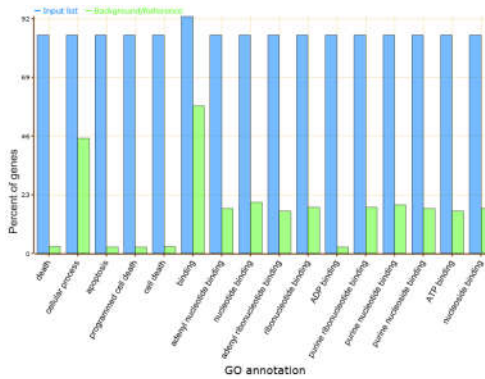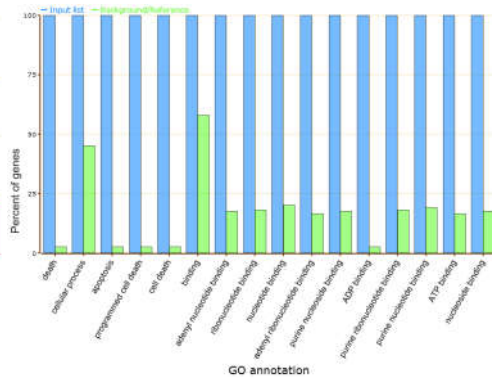

*P. ussuriensis* (Chr01, 808562 bp)

*P. maximowiczii* (Chr01, 333616 bp)

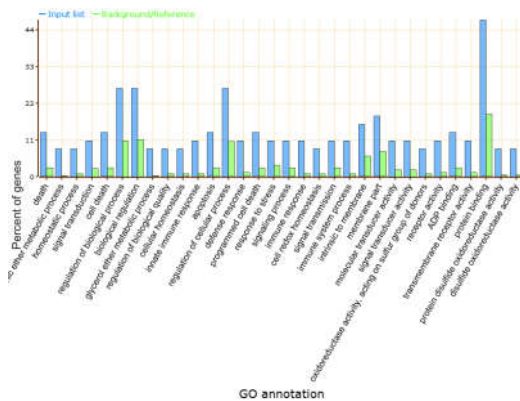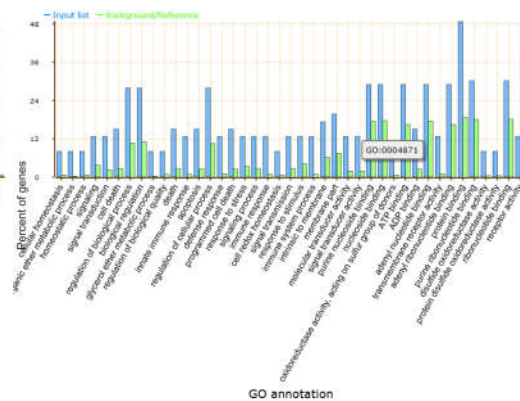

GO annotation

GO annotation

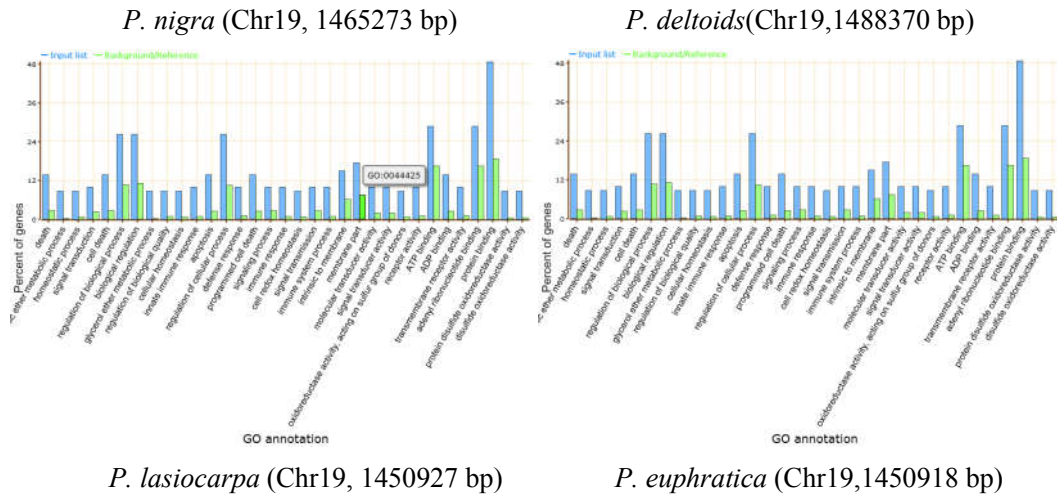

Supplementary Figure 7 Significantly enriched GO terms of genes located in one of the large deletions of the 10 poplar species. The chromosome and size of the large deletion in each species were presented under the panel.

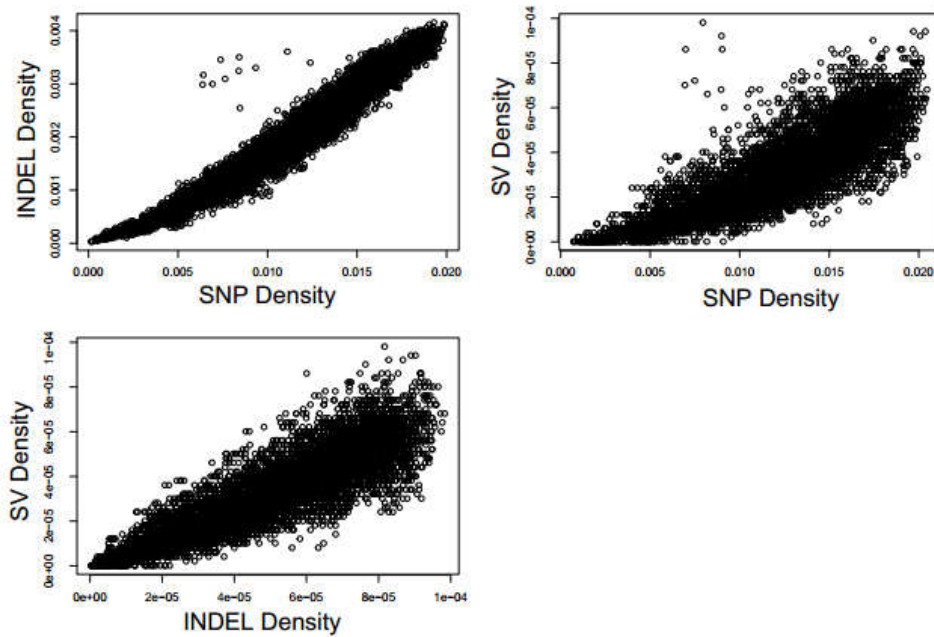

Supplementary Figure 8 Correlation plot for SNP, indel, and SV density (excluding CTXs and ITXs from the SV density calculation) in the *P. alba* genome (window: 500 kb, step: 50 kb).

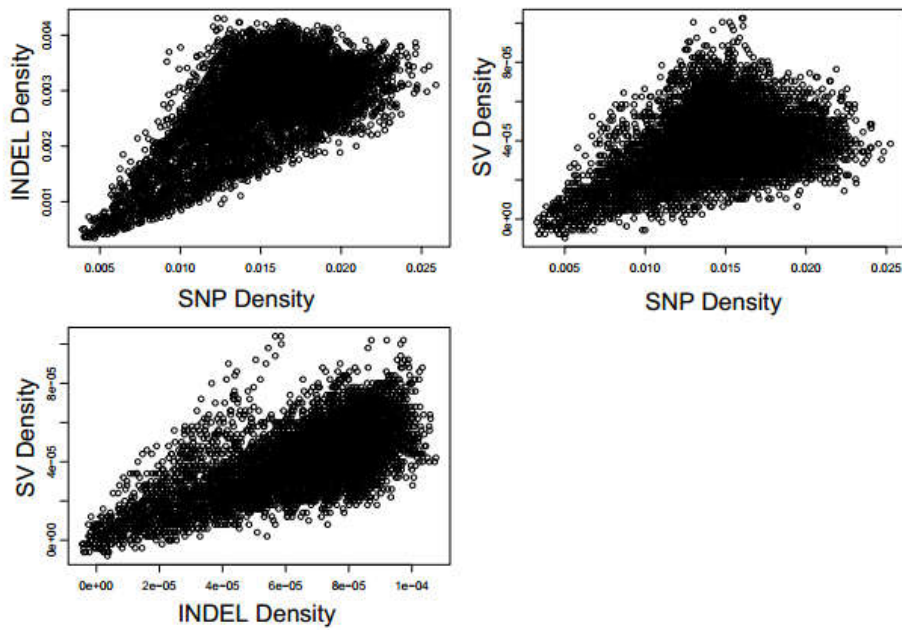

Supplementary Figure 9 Correlation plot for SNP, indel, and SV density (excluding CTXs and ITXs from the SV density calculation) in the *P. cathayana* (right) genome (window: 500 kb, step: 50 kb).

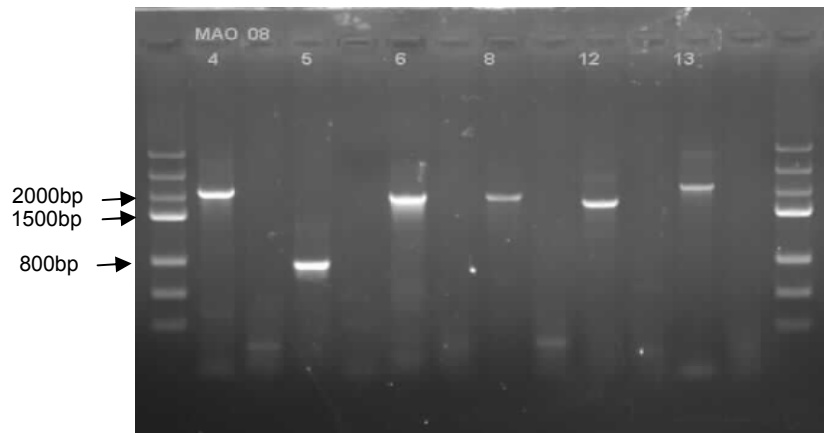

Supplementary Figure 10 Validation of bioinformatic-detected deletions in *P. lasiocarpa* based on PCR. For each deletion, the primers within the deletion region were designed according to the reference genome sequence. Lanes 1 and 14 are DNA markers; lanes 2, 4, 6, 8, and 10 are the PCR results using *P. trichocarpa* genomic DNA as templates; and lanes 3, 5, 7, 9, and 11 are the PCR results using *P. lasiocarpa* genomic DNA as templates. The Arabic numerals (4, 5, 6, 8, 12, and 13) represent the PCR primer pairs (e.g., 4 represents the primers of 08DEL-L4, 08DEL-R4). DNA marker III (Biosharp Inc., Seoul, South Korea) was used for the markers.

## Supplementary Tables

Supplementary Table 1 Summary of the 10 sequenced poplar species and collection locations.

| clone | Species                       | Section                             | Geographic distribution |
|-------|-------------------------------|-------------------------------------|-------------------------|
| 01    | <i>P. alba</i> L.             | Leuce Duby, subsect. Albidae Dode.  | 87°40', 47°26'          |
| 17    | <i>P. davidiana</i> Dode.     | Leuce Duby, subsect. Trepidae Dode. | 126°31', 43°47'         |
| 06    | <i>P. cathayana</i> Rehd.     | Tacamahaca Spach.                   | 116°12', 39°57'         |
| 07    | <i>P. simonii</i> Carr.       | Tacamahaca Spach.                   | 116°12', 39°59'         |
| 09    | <i>P. ussuriensis</i> Kom.    | Tacamahaca Spach.                   | 129°1', 47°0'           |
| 19    | <i>P. maximowiczii</i> Henry. | Tacamahaca Spach.                   | 124°47', 40°44'         |
| 11    | <i>P. nigra</i> L.            | Aigeiros Duby.                      | 87°36', 47°4'           |
| 12    | <i>P. deltoides</i> Bartr.    | Aigeiros Duby.                      | 119°10', 39°43'         |
| 08    | <i>P. lasiocarpa</i> Oliv.    | Leucoides Spach.                    | 110°56', 31°4'          |
| 15    | <i>P. euphratica</i> Oliv.    | Turanga Bge.                        | 86°22', 41°17'          |

Supplementary Table 2 Resequencing summary of the 10 poplar species.

| Sections/ species              | GC Rate (%) | Quality value $\geq 20$ Rate (%) | Quality value $\geq 30$ Rate (%) | Production |           | Insert Size (bp) | Coverage rate (%) | Mapped Rate (%) | UniqMapped Rate (%) | Sequencing depth(X) |
|--------------------------------|-------------|----------------------------------|----------------------------------|------------|-----------|------------------|-------------------|-----------------|---------------------|---------------------|
|                                |             |                                  |                                  | Reads (M)  | Bases (G) |                  |                   |                 |                     |                     |
| <b>Sect. Leuce Duby</b>        |             |                                  |                                  |            |           |                  |                   |                 |                     |                     |
| <i>P. alba</i> L.              | 37.76       | 96.44                            | 90.28                            | 182.29     | 16.41     | 482              | 58.90             | 59.95           | 31.32               | 34.08               |
| <i>P. davidiana</i> Dode.      | 37.99       | 97.13                            | 91.74                            | 182.77     | 16.45     | 469              | 59.05             | 59.34           | 31.53               | 35.42               |
| <b>Sect. Tacamahaca Spach.</b> |             |                                  |                                  |            |           |                  |                   |                 |                     |                     |
| <i>P. cathayana</i> Rehd.      | 36.71       | 96.73                            | 90.81                            | 182.89     | 16.46     | 473              | 86.94             | 77.39           | 44.85               | 35.13               |
| <i>P. simonii</i> Carr.        | 36.92       | 96.35                            | 89.93                            | 182.50     | 16.43     | 469              | 79.83             | 76.74           | 44.51               | 35.55               |
| <i>P. ussuriensis</i> Kom.     | 36.63       | 95.42                            | 87.92                            | 181.53     | 16.34     | 471              | 85.41             | 81.04           | 49.39               | 35.42               |
| <i>P. maximowiczii</i> Henry.  | 35.40       | 96.59                            | 90.98                            | 182.98     | 16.47     | 470              | 85.44             | 79.80           | 47.74               | 36.15               |
| <b>Sect. Aigeiros Duby.</b>    |             |                                  |                                  |            |           |                  |                   |                 |                     |                     |
| <i>P. nigra</i> L.             | 36.90       | 97.14                            | 91.76                            | 182.73     | 16.45     | 468              | 76.54             | 75.25           | 43.23               | 35.02               |
| <i>P. deltoides</i> Bartr.     | 35.95       | 92.47                            | 83.19                            | 166.74     | 15.01     | 473              | 79.10             | 72.73           | 41.03               | 32.57               |
| <b>Sect. Leucoides Spach.</b>  |             |                                  |                                  |            |           |                  |                   |                 |                     |                     |
| <i>P. lasiocarpa</i> Oliv.     | 37.64       | 96.36                            | 90.29                            | 182.71     | 16.44     | 480              | 80.18             | 77.20           | 43.13               | 35.35               |
| <b>Sect. Turanga Bge.</b>      |             |                                  |                                  |            |           |                  |                   |                 |                     |                     |
| <i>P. euphratica</i> Oliv.     | 34.99       | 90.02                            | 89.15                            | 182.68     | 16.44     | 470              | 54.16             | 59.48           | 27.26               | 34.15               |
| Total                          |             |                                  |                                  | 1809.83    | 162.89    |                  |                   |                 |                     |                     |

Note: Coverage rate (%)” represents the percentage of the genome covered.



Supplementary Table 3 Summary of all detected SNPs from the 10 poplar species and their distributions in different genic regions.

| Sections/ species             | SNP        | Homo       | Hete       | CDS       | Syn_CDS   | Nonsyn_CDS | stop_codon | UTR       | Intron     | IG         |
|-------------------------------|------------|------------|------------|-----------|-----------|------------|------------|-----------|------------|------------|
| Sect. Leuce Duby              |            |            |            |           |           |            |            |           |            |            |
| <i>P. alba</i> L.             | 5,176,530  | 3,826,237  | 1,350,293  | 866,114   | 416,756   | 449,358    | 5,074      | 506,466   | 1,707,434  | 2,096,516  |
| <i>P. davidiana</i> Dode.     | 5,424,245  | 3,735,247  | 1,688,998  | 900,957   | 431,136   | 469,821    | 5,382      | 518,489   | 1,739,881  | 2,264,918  |
| Sect. Tacamahaca Spach.       |            |            |            |           |           |            |            |           |            |            |
| <i>P. cathayana</i> Rehd.     | 6,564,546  | 4,601,872  | 1,962,674  | 436,754   | 194,544   | 242,210    | 3,759      | 264,518   | 954,800    | 4,908,474  |
| <i>P. simonii</i> Carr.       | 6,337,615  | 4,967,333  | 1,370,282  | 505,688   | 227,631   | 278,057    | 4,230      | 308,226   | 1,103,421  | 4,420,280  |
| <i>P. ussuriensis</i> Kom.    | 6,741,894  | 4,496,649  | 2,245,245  | 430,110   | 191,063   | 239,047    | 3,749      | 261,239   | 945,413    | 5,105,132  |
| <i>P. maximowiczii</i> Henry. | 6,936,296  | 4,809,778  | 2,126,518  | 427,390   | 190,731   | 236,659    | 3,657      | 261,391   | 952,832    | 5,294,683  |
| Sect. Aigeiros Duby.          |            |            |            |           |           |            |            |           |            |            |
| <i>P. nigra</i> L.            | 6,098,042  | 5,132,380  | 965,662    | 508,475   | 234,138   | 274,337    | 3,913      | 320,278   | 1,130,870  | 4,138,419  |
| <i>P. deltoides</i> Bartr.    | 6,398,415  | 4,753,823  | 1,644,592  | 516,748   | 236,906   | 279,842    | 4,183      | 332,515   | 1,159,007  | 4,390,145  |
| Sect. Leucoides Spach.        |            |            |            |           |           |            |            |           |            |            |
| <i>P. lasiocarpa</i> Oliv.    | 5,870,412  | 4,782,476  | 1,087,936  | 460,136   | 204,935   | 255,201    | 3,734      | 281,338   | 975,999    | 4,152,939  |
| Sect. Turanga Bge.            |            |            |            |           |           |            |            |           |            |            |
| <i>P. euphratica</i> Oliv.    | 5,067,560  | 4,258,535  | 809,025    | 874,009   | 421,347   | 452,662    | 5,175      | 530,449   | 1,848,226  | 1,814,876  |
| Total                         | 60,615,555 | 45,364,330 | 15,251,225 | 5,926,381 | 2,749,187 | 3,177,194  | 42,856     | 3,584,909 | 12,517,883 | 38,586,382 |

Note: Homo: homozygous; hete: heterozygous; syn: synonymous; Nonsyn: nonsynonymous; UTR: untranslated region; IG: intergenic region

Supplementary Table 4 Heterozygous/homozygous SNP ratio in the 10 poplar species.

| Sections/ species             | SNP       | Homo      | Hete      | Hete/Homo |
|-------------------------------|-----------|-----------|-----------|-----------|
| Sect. Leuce Duby              |           |           |           |           |
| <i>P. alba</i> L.             | 5,176,530 | 3,826,237 | 1,350,293 | 0.35      |
| <i>P. davidiana</i> Dode.     | 5,424,245 | 3,735,247 | 1,688,998 | 0.45      |
| Sect. Tacamahaca Spach.       |           |           |           |           |
| <i>P. cathayana</i> Rehd.     | 6,564,546 | 4,601,872 | 1,962,674 | 0.43      |
| <i>P. simonii</i> Carr.       | 6,337,615 | 4,967,333 | 1,370,282 | 0.28      |
| <i>P. ussuriensis</i> Kom.    | 6,741,894 | 4,496,649 | 2,245,245 | 0.50      |
| <i>P. maximowiczii</i> Henry. | 6,936,296 | 4,809,778 | 2,126,518 | 0.44      |
| Sect. Aigeiros Duby.          |           |           |           |           |
| <i>P. nigra</i> L.            | 6,098,042 | 5,132,380 | 965,662   | 0.19      |
| <i>P. deltoides</i> Bartr.    | 6,398,415 | 4,753,823 | 1,644,592 | 0.35      |
| Sect. Leucoides Spach.        |           |           |           |           |
| <i>P. lasiocarpa</i> Oliv.    | 5,870,412 | 4,782,476 | 1,087,936 | 0.23      |
| Sect. Turanga Bge.            |           |           |           |           |
| <i>P. euphratica</i> Oliv.    | 5,067,560 | 4,258,535 | 809,025   | 0.19      |

Note: Homo: homozygous; Hete: heterozygous.

Supplementary Table 5 Nonsynonymous/synonymous substitutions ratio in the 10 poplar species.

| <b>Sections/ species</b>      | <b>SNP</b> | <b>Syn_CDS</b> | <b>Nonsyn_CDS</b> | <b>Nonsyn/Syn</b> |
|-------------------------------|------------|----------------|-------------------|-------------------|
| Sect. Leuce Duby              |            |                |                   |                   |
| <i>P. alba</i> L.             | 5,176,530  | 416,756        | 449,358           | 1.08              |
| <i>P. davidiana</i> Dode.     | 5,424,245  | 431,136        | 469,821           | 1.09              |
| Sect. Tacamahaca Spach.       |            |                |                   |                   |
| <i>P. cathayana</i> Rehd.     | 6,564,546  | 194,544        | 242,210           | 1.25              |
| <i>P. simonii</i> Carr.       | 6,337,615  | 227,631        | 278,057           | 1.22              |
| <i>P. ussuriensis</i> Kom.    | 6,741,894  | 191,063        | 239,047           | 1.25              |
| <i>P. maximowiczii</i> Henry. | 6,936,296  | 190,731        | 236,659           | 1.24              |
| Sect. Aigeiros Duby.          |            |                |                   |                   |
| <i>P. nigra</i> L.            | 6,098,042  | 234,138        | 274,337           | 1.17              |
| <i>P. deltoides</i> Bartr.    | 6,398,415  | 236,906        | 279,842           | 1.18              |
| Sect. Leucoides Spach.        |            |                |                   |                   |
| <i>P. lasiocarpa</i> Oliv.    | 5,870,412  | 204,935        | 255,201           | 1.25              |
| Sect. Turanga Bge.            |            |                |                   |                   |
| <i>P. euphratica</i> Oliv.    | 5,067,560  | 421,347        | 452,662           | 1.07              |
| Average                       |            |                |                   | 1.16              |

Note: syn, synonymous; Nonsyn: nonsynonymous;

Supplementary Table 6 Classification of nucleotide substitutions in SNPs detected in the 10 poplar species.

| Sections/ species             | Transitions(Ts) |           |         | Transversions(Tv) |         |         | Ts/Tv ratio |
|-------------------------------|-----------------|-----------|---------|-------------------|---------|---------|-------------|
|                               | C / T           | A / G     | A / T   | A / C             | T / G   | C / G   |             |
| Sect. Leuce Duby              |                 |           |         |                   |         |         |             |
| <i>P. alba</i> L.             | 1,525,757       | 1,527,967 | 735,653 | 532,282           | 531,184 | 323,687 | 1.44        |
| <i>P. davidiana</i> Dode.     | 1,586,863       | 1,592,096 | 775,893 | 561,649           | 562,126 | 345,618 | 1.42        |
| Sect. Tacamahaca Spach.       |                 |           |         |                   |         |         |             |
| <i>P. cathayana</i> Rehd.     | 2,133,125       | 2,136,906 | 805,273 | 581,400           | 582,042 | 325,800 | 1.86        |
| <i>P. simonii</i> Carr.       | 2,015,570       | 2,015,992 | 803,975 | 584,471           | 585,986 | 331,621 | 1.75        |
| <i>P. ussuriensis</i> Kom.    | 2,192,089       | 2,197,789 | 830,027 | 594,694           | 595,986 | 331,309 | 1.87        |
| <i>P. maximowiczii</i> Henry. | 2,253,248       | 2,260,210 | 864,186 | 609,377           | 611,445 | 337,830 | 1.86        |
| Sect. Aigeiros Duby.          |                 |           |         |                   |         |         |             |
| <i>P. nigra</i> L.            | 194,1973        | 1,944,416 | 764,572 | 561,669           | 563,242 | 322,170 | 1.76        |
| <i>P. deltoides</i> Bartr.    | 2,027,974       | 2,030,171 | 823,081 | 587,973           | 589,704 | 339,512 | 1.73        |
| Sect. Leucoides Spach.        |                 |           |         |                   |         |         |             |
| <i>P. lasiocarpa</i> Oliv.    | 1,885,256       | 1,888,632 | 722,704 | 535,152           | 535,793 | 302,875 | 1.80        |
| Sect. Turanga Bge.            |                 |           |         |                   |         |         |             |
| <i>P. euphratica</i> Oliv.    | 1,471,287       | 1,472,169 | 721,619 | 533,713           | 533,397 | 335,375 | 1.39        |

Supplementary Table 7 Significantly enriched GO terms of genes with common SNPs of the 10 poplar species.

| GO term    | Ontology | Description                                                                         | Number in input list | Number in BG/Ref | p-value  | FDR   |
|------------|----------|-------------------------------------------------------------------------------------|----------------------|------------------|----------|-------|
| GO:0019219 | P        | regulation of nucleobase, nucleoside, nucleotide and nucleic acid metabolic process | 888                  | 1568             | 0.00008  | 0.042 |
| GO:0006807 | P        | nitrogen compound metabolic process                                                 | 1636                 | 3018             | 5.70E-05 | 0.042 |
| GO:0051171 | P        | regulation of nitrogen compound metabolic process                                   | 888                  | 1568             | 8.00E-05 | 0.042 |
| GO:0045449 | P        | regulation of transcription                                                         | 885                  | 1562             | 7.90E-05 | 0.042 |
| GO:0006355 | P        | regulation of transcription, DNA-dependent                                          | 884                  | 1560             | 7.90E-05 | 0.042 |
| GO:0006139 | P        | nucleobase, nucleoside, nucleotide and nucleic acid metabolic process               | 1453                 | 2651             | 3.90E-05 | 0.042 |
| GO:0016070 | P        | RNA metabolic process                                                               | 1136                 | 2029             | 3.00E-05 | 0.042 |
| GO:0051252 | P        | regulation of RNA metabolic process                                                 | 884                  | 1560             | 7.90E-05 | 0.042 |
| GO:0010556 | P        | regulation of macromolecule biosynthetic process                                    | 889                  | 1577             | 0.00012  | 0.044 |
| GO:0009889 | P        | regulation of biosynthetic process                                                  | 889                  | 1577             | 0.00012  | 0.044 |
| GO:0080090 | P        | regulation of primary metabolic process                                             | 893                  | 1585             | 0.00012  | 0.044 |
| GO:0031326 | P        | regulation of cellular biosynthetic process                                         | 889                  | 1577             | 0.00012  | 0.044 |
| GO:0030528 | F        | transcription regulator activity                                                    | 661                  | 1110             | 1.20E-05 | 0.04  |
| GO:0003677 | F        | DNA binding                                                                         | 1211                 | 2173             | 2.80E-05 | 0.046 |

Note: F:Molecular Function; P:Biological Process

Supplementary Table 8 Distribution of large-effect SNPs in the genic regions of the 10 poplar species.

| Sections/ species             | SNPs       | Premature stop SNPs | Stop to non-stop codon SNPs | Start to non-start codon SNPs | Total large effect SNPs     |
|-------------------------------|------------|---------------------|-----------------------------|-------------------------------|-----------------------------|
| Sect. Leuce Duby              |            |                     |                             |                               |                             |
| <i>P. alba</i> L.             | 5,176,530  | 5,074               | 1,070                       | 14,769                        | 20,913 (0.40%) <sup>a</sup> |
| <i>P. davidiana</i> Dode.     | 5,424,245  | 5,382               | 1,106                       | 15,496                        | 21,984 (0.41%)              |
| Sect. Tacamahaca Spach.       |            |                     |                             |                               |                             |
| <i>P. cathayana</i> Rehd.     | 6,564,546  | 3,759               | 776                         | 7,781                         | 12,316 (0.19%)              |
| <i>P. simonii</i> Carr.       | 6,337,615  | 4,230               | 846                         | 9,008                         | 17,468 (0.22%)              |
| <i>P. ussuriensis</i> Kom.    | 6,741,894  | 3,749               | 761                         | 7,707                         | 12,217 (0.18%)              |
| <i>P. maximowiczii</i> Henry. | 6,936,296  | 3,657               | 755                         | 7,772                         | 12,184 (0.18%)              |
| Sect. Aigeiros Duby.          |            |                     |                             |                               |                             |
| <i>P. nigra</i> L.            | 6,098,042  | 3,913               | 838                         | 8,997                         | 13,748 (0.23%)              |
| <i>P. deltoides</i> Bartr.    | 6,398,415  | 4,183               | 833                         | 9,179                         | 14,195 (0.22%)              |
| Sect. Leucoides Spach.        |            |                     |                             |                               |                             |
| <i>P. lasiocarpa</i> Oliv.    | 5,870,412  | 3,734               | 805                         | 8,321                         | 12,860 (0.22%)              |
| Sect. Turanga Bge.            |            |                     |                             |                               |                             |
| <i>P. euphratica</i> Oliv.    | 5,067,560  | 5,175               | 1,068                       | 14,722                        | 20,965 (0.41%)              |
| Total                         | 6,0615,555 | 42,856              | 12,242                      | 103,752                       | 155,466                     |
| Percentage of the total       |            | 0.071               | 0.015                       | 0.171                         | 0.256                       |

a. The percentage of the large effect SNPs in the total SNP in each species.

Supplementary Table 9 Summary of all detected small indels from the 10 poplar species and their distributions in different genic regions.

| Sections/ speices             | Indel      | Insertion | Deletion  | UTR     | CDS     | frameshift | Non-frameshift | D/Iratio | Shift/Non_shift |
|-------------------------------|------------|-----------|-----------|---------|---------|------------|----------------|----------|-----------------|
| Sect. Leuce Duby              |            |           |           |         |         |            |                |          |                 |
| <i>P. alba</i> L.             | 849,526    | 410,724   | 438,802   | 107,974 | 33,395  | 19,493     | 13,902         | 1.07     | 1.40            |
| <i>P. devidiana</i> Dode.     | 923,668    | 439,617   | 484,051   | 114,827 | 36,425  | 21,241     | 15,184         | 1.10     | 1.40            |
| Sect. Tacamahaca Spach.       |            |           |           |         |         |            |                |          |                 |
| <i>P. cathayana</i> Rehd.     | 1,140,033  | 572,155   | 567,878   | 64,319  | 22,094  | 13,102     | 8,992          | 0.99     | 1.46            |
| <i>P. simonii</i> Carr.       | 1,095,352  | 542,563   | 552,789   | 73,991  | 24,777  | 14,812     | 9,965          | 1.02     | 1.49            |
| <i>P. ussuriensis</i> Kom.    | 1,178,680  | 601,362   | 577,318   | 62,926  | 21,643  | 12,812     | 8,831          | 0.96     | 1.45            |
| <i>P. maximowiczii</i> Henry. | 1,244,563  | 632,081   | 612,482   | 62,846  | 21,510  | 12,652     | 8,858          | 0.97     | 1.43            |
| Sect. Aigeiros Duby.          |            |           |           |         |         |            |                |          |                 |
| <i>P. nigra</i> L.            | 1,027,498  | 511,937   | 515,561   | 73,515  | 23,334  | 13,752     | 9,582          | 1.01     | 1.44            |
| <i>P. deltoides</i> Bartr.    | 1,091,146  | 543,963   | 547,183   | 74,608  | 23,525  | 13,934     | 9,591          | 1.01     | 1.45            |
| Sect. Leucoides Spach.        |            |           |           |         |         |            |                |          |                 |
| <i>P. lasiocarpa</i> Oliv.    | 966,135    | 491,263   | 474,872   | 66,464  | 22,592  | 13,217     | 9,375          | 0.97     | 1.41            |
| Sect. Turanga Bge.            |            |           |           |         |         |            |                |          |                 |
| <i>P. euphratica</i> Oliv.    | 801,186    | 367,867   | 433,319   | 105,016 | 31,118  | 18,479     | 12,639         | 1.18     | 1.46            |
| Total                         | 10,317,787 | 5,113,532 | 5,204,255 | 806,486 | 260,413 | 153,494    | 106,919        |          |                 |

Note: D/I ratio: deletions/insertions; Shift/non\_shift: frameshift indels/nonframeshift indels

Supplementary Table 10 List of primers used for the SNP and indel validation in *P. alba* based on PCR and Sanger sequencing.

| primer | primer sequence                                 | Product size(bp) | Chr.  | Position           |
|--------|-------------------------------------------------|------------------|-------|--------------------|
| SN2    | AGACTCGGCGGAATCATGT<br>GACATGTCGTGGGTGTCAAC     | 472              | Chr02 | 7183616..7184116   |
| SN4    | GGGACACATGAAGTGAATTGG<br>TTTCTTTGAGTTCTCCGCAAG  | 383              | Chr03 | 10567544..10567944 |
| SN5    | GACCCTCACGCCTAGAACAA<br>GGGCTCTTGCTACTCCACTC    | 445              | Chr04 | 17226103..17226602 |
| SN8    | AGTGGCTGCATCTGCAAGTA<br>CAAGTCTCCAAATGTCAAGCTG  | 425              | Chr06 | 24710499..24710998 |
| S1     | AAGAGGCACCCATCTTAGCT<br>GCCTTAAATGGGATGCTGCA    | 420              | Chr19 | 15289305..15289805 |
| S3     | AGTTCAAGCCCGATCAGTCA<br>GGAACGTAAACCATGCTCATAGT | 478              | Chr01 | 38985248..38985748 |
| S4     | GTCCAAGAGCAGCCCTGA<br>GAAAGCAGAAAGTCCATGGCA     | 401              | Chr07 | 1939137..1939637   |
| ID-3   | GCGAATGAATAGGCCAGAGA<br>AGGTATGGCTTCTGCAAGGA    | 413              | Chr04 | 2488007..2488607   |
| ID-5   | TGATGAAGCAGACACCGAGT<br>GTTGACATGACCTGCGTGAG    | 402              | Chr13 | 9861266..9861866   |
| ID-6   | GCTAGCTCTCCCTCCAGAG<br>CAAGCTTGGATGTCTATGTTGC   | 535              | Chr02 | 4553634.. 4554234  |
| ID-7   | TCCCATCTCCTTGAGCTTGT<br>TTAAATGCCCATGCCTTGT     | 407              | Chr11 | 7828319..7828919   |
| ID-8   | GTCGGAACCAATTCCCCTAT<br>CCAGGCTCACCACATATCAA    | 498              | Chr10 | 1868548..1868608   |
| ID-11  | TAATGCAACGCCTGTTCATC<br>CCTTCATTTACCGCCAGAAA    | 494              | Chr15 | 9547830..9548430   |
| ID-12  | GCTGAATCGCCAGCAGTAAT<br>CTGTCCGAGGATGGAAGTGT    | 531              | Chr09 | 6326406.. 6327004  |

Supplementary Table 11 List of primers used for the SNP and indel validation in *P. deltooides* based on PCR and Sanger sequencing.

| primer | primer sequence                                    | Product size(bp) | Chr.  | Position           |
|--------|----------------------------------------------------|------------------|-------|--------------------|
| ID -1  | TGCTCGTCGATCATTGTTTTCT<br>AGCCCAACTCATCACCAGAA     | 909              | Chr02 | 9342957..9344000   |
| ID -3  | TCATCATATAGTGGACAATGGGC<br>TGGGATGTGATAATCAAAGGTGC | 900              | Chr10 | 318326..319370     |
| ID -4  | TGGGAAGAAAGGAGTTGGCG<br>ACGGCAAGCTGACTCCATAA       | 906              | Chr10 | 1335978..13360822  |
| ID -5  | ACCGGAGCAATATCAACAAGGA<br>CTTCAAGGTGAGGGCAGGTG     | 628              | Chr07 | 10042968..10044010 |
| ID -12 | TCCGTACACTTTGCCATTTCA<br>TTTCCACGCACAGCTTATGG      | 1063             | Chr05 | 4781754..4782870   |
| ID -14 | TCCAAATTCCAATCATGACACGT<br>CGCCTCTTACTGGTGGGAAT    | 1021             | Chr13 | 4488053..4489104   |



Supplementary Table 12 List of primers used for the PCR-based verification of several predicted deletions in *P. lasiocarpa*.

| Chromosome | Primer name            | Primer sequence                                    | Start<br>( <i>P. trichocarpa</i> ) | End<br>( <i>P. trichocarpa</i> ) | Deletion length(bp) | <i>P. trichocarpa</i><br>size(bp) | <i>P. lasiocarpa</i><br>size(bp) |
|------------|------------------------|----------------------------------------------------|------------------------------------|----------------------------------|---------------------|-----------------------------------|----------------------------------|
| Chr09      | 08DEL-L4<br>08DEL-R4   | GACCCTACATTCACGAGTCTTTT<br>TCCTCCTCCGTAAC TTTGAACA | 594,367                            | 596,635                          | 2,314               | 2,176                             | 0                                |
| Chr01      | 08DEL-L5<br>08DEL-R5   | GTGAAACGCTGAGCAGTCTT<br>ACCCGTGAAATCAGGTTAACC      | 22,573,650                         | 22,575,928                       | 2,279               | 794                               | 0                                |
| Chr18      | 08DEL-L6<br>08DEL-R6   | GGGCTTTTAATGGGCTTCGTAA<br>TTCCCTTTCATACAGCCGC      | 2,080,068                          | 2,082,396                        | 2,337               | 1,893                             | 0                                |
| Chr10      | 08DEL-L8<br>08DEL-R8   | GTGGATCGCTTGGGAGGT<br>TTGATGCCCATATGACTTGAAAG      | 16,891,783                         | 16,894,075                       | 2,304               | 1,993                             | 0                                |
| Chr03      | 08DEL-L12<br>08DEL-R12 | TTTGGTCAAATCAGGGGCTT<br>TGTGGCAAATGTGTGGAGAC       | 3,503,829                          | 3,506,117                        | 2,311               | 1,791                             | 0                                |
| Chr18      | 08DEL-L13<br>08DEL-R13 | CGACAAGAGGAGGGAGAAAGT<br>TGAGCCAAGTCAAGGTCCC       | 5,934,833                          | 5,937,375                        | 2,588               | 2,258                             | 0                                |

Supplementary Table 13 Ks range of the 10 poplar species.

| <b>Sections/ species</b>      | <b>Ks range</b> |
|-------------------------------|-----------------|
| Sect. Leuce Duby              |                 |
| <i>P. alba</i> L.             | 0.03-0.04       |
| <i>P. devidiana</i> Dode.     | 0.03-0.04       |
| Sect. Tacamahaca Spach.       |                 |
| <i>P. cathayana</i> Rehd.     | 0.01-0.02       |
| <i>P. simonii</i> Carr.       | 0.01-0.02       |
| <i>P. ussuriensis</i> Kom.    | 0.01-0.02       |
| <i>P. maximowiczii</i> Henry. | 0.01-0.02       |
| Sect. Aigeiros Duby.          |                 |
| <i>P. nigra</i> L.            | 0.01-0.02       |
| <i>P. deltoides</i> Bartr.    | 0.01-0.02       |
| Sect. Leucoides Spach.        |                 |
| <i>P. lasiocarpa</i> Oliv.    | 0.01-0.02       |
| Sect. Turanga Bge.            |                 |
| <i>P. euphratica</i> Oliv.    | 0.04-0.05       |
